# Supplementary material for: Dipeptide Repeat Pathology in C9orf72-ALS Is Associated with Redox, Mitochondrial and NRF2 Pathway Imbalance
Source: MDPI journal article supplement (doi:10.3390/antiox11101897), 2022-09-25
Supplement: s1 [file s1]

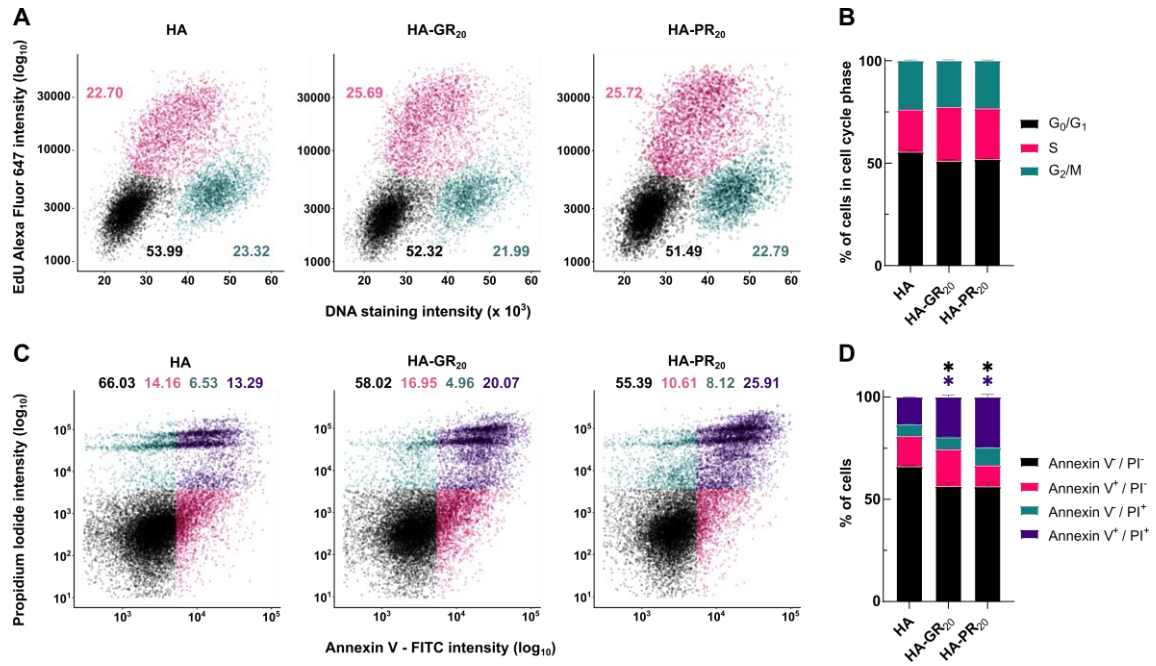

**Figure S1.** Analysis of Arg-DPRs on cell cycle and survival of NSC34 cell line. **A**, cell cycle progression measured by flow cytometry of EdU incorporation and DNA content in NSC34 cells treated with either 6  $\mu$ M HA, HA-GR<sub>20</sub> or HA-PR<sub>20</sub> for 24h. **A**, representative sample of 10,000 cells is shown for each experimental condition. **B**, comparison of the percentages of G<sub>0</sub>/G<sub>1</sub> cells, S and G<sub>2</sub>/M determined by EdU and total DNA staining. **C**, determination by flow cytometry of Arg-DPRs-induced apoptosis and necrosis in cells stained with Annexin-V-FITC and propidium iodide (PI). NSC34 cells were treated with either 6  $\mu$ M HA, HA-GR<sub>20</sub> or HA-PR<sub>20</sub> for 24 h and then stained for 15 min with 1/100 Annexin-V-FITC and 1  $\mu$ g/ml PI. A representative sample of 10,000 cells is shown for each experimental condition. **D**, comparison of the percentages of each population, \*\*  $p < 0.001$  for cells double-positive and double-negative for Annexin V-FITC and PI comparing Arg-DPRs with HA groups. In A and C, numbers represent the percentage for each population of the shown sample, matching the text colour with the population colour.

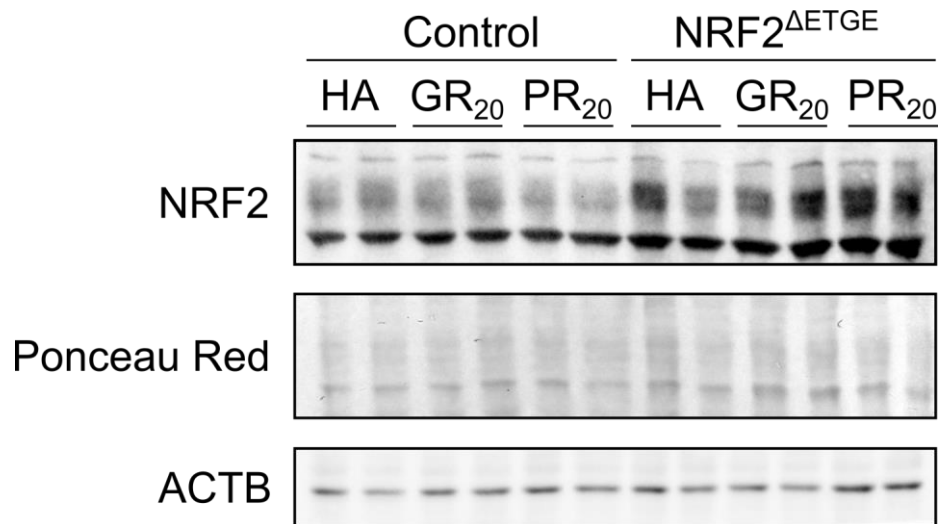

**Figure S2 (related to Figure 7).** Overexpression of NRF2<sup>ΔETGE</sup> through lentiviral delivery. NSC34 cells were transduced with either control lentiviral particles or encoding the stable NRF2 version lacking the ETGE KEAP1-binding motif for 48 h and then treated with 6  $\mu$ M of HA, HA-GR<sub>20</sub> or HA-PR<sub>20</sub> peptides for 24 h. The levels of the indicated proteins were measured by immunoblot. ACTB levels and Ponceau Red staining were determined as loading controls.
