# Supplementary material for: Dipeptide Repeat Pathology in C9orf72-ALS Is Associated with Redox, Mitochondrial and NRF2 Pathway Imbalance
Source: MDPI journal article supplement (doi:10.3390/antiox11101897), 2022-09-25
Supplement: s1 [file s1]

**Table S2.** Complete descriptive statistics and statistical analysis of redox-focused profiling in C9orf72 ALS-patients vs. healthy controls.

| Gene            | Ensembl Gene ID | Mean log <sub>2</sub> FC | SD   | Wilcoxon test p-value |
|-----------------|-----------------|--------------------------|------|-----------------------|
| <i>DHCR24</i>   | ENSG00000116133 | -0.72                    | 0.37 | 0.0023                |
| <i>TRAPPC6A</i> | ENSG00000007255 | -0.58                    | 0.27 | 0.0041                |
| <i>GPX3</i>     | ENSG00000211445 | -0.59                    | 0.21 | 0.0041                |
| <i>GSR</i>      | ENSG00000104687 | -0.44                    | 0.32 | 0.0070                |
| <i>FHL2</i>     | ENSG00000115641 | -0.96                    | 0.75 | 0.0111                |
| <i>CYBB</i>     | ENSG00000165168 | 0.53                     | 0.45 | 0.0175                |
| <i>NUDT1</i>    | ENSG00000106268 | -0.35                    | 0.27 | 0.0262                |
| <i>CCS</i>      | ENSG00000173992 | -0.67                    | 0.50 | 0.0262                |
| <i>DUOX2</i>    | ENSG00000140279 | -1.79                    | 1.63 | 0.0262                |
| <i>FOXM1</i>    | ENSG00000111206 | -0.49                    | 0.19 | 0.0379                |
| <i>PRDX5</i>    | ENSG00000126432 | -0.20                    | 0.21 | 0.0728                |
| <i>PRDX6</i>    | ENSG00000117592 | -0.43                    | 0.24 | 0.0728                |
| <i>DUOX1</i>    | ENSG00000137857 | -0.59                    | 0.60 | 0.0728                |
| <i>PTGS1</i>    | ENSG00000095303 | -0.53                    | 0.54 | 0.0973                |
| <i>SIRT2</i>    | ENSG00000068903 | -0.32                    | 0.39 | 0.1280                |
| <i>PDLIM1</i>   | ENSG00000107438 | -0.43                    | 0.51 | 0.1280                |
| <i>SRXN1</i>    | ENSG00000271303 | -0.46                    | 0.58 | 0.1280                |
| <i>UCP2</i>     | ENSG00000175567 | -0.16                    | 0.22 | 0.1650                |
| <i>ALOX12</i>   | ENSG00000108839 | -0.39                    | 0.41 | 0.1650                |
| <i>CYGB</i>     | ENSG00000161544 | -0.56                    | 1.12 | 0.1650                |
| <i>GLA</i>      | ENSG00000102393 | -0.41                    | 0.45 | 0.1810                |
| <i>TPO</i>      | ENSG00000115705 | 1.11                     | 2.06 | 0.2090                |
| <i>LPO</i>      | ENSG00000167419 | 0.52                     | 0.84 | 0.2400                |
| <i>NQO1</i>     | ENSG00000181019 | 0.19                     | 0.25 | 0.2590                |
| <i>GPX4</i>     | ENSG00000167468 | -0.11                    | 0.19 | 0.2590                |
| <i>RNF7</i>     | ENSG00000114125 | -0.12                    | 0.21 | 0.2590                |
| <i>HMOX1</i>    | ENSG00000100292 | -0.22                    | 0.57 | 0.2590                |
| <i>SFTPD</i>    | ENSG00000133661 | -0.39                    | 0.53 | 0.2590                |
| <i>CAT</i>      | ENSG00000121691 | -0.42                    | 0.62 | 0.2590                |
| <i>EPX</i>      | ENSG00000121053 | -0.50                    | 0.86 | 0.2590                |
| <i>PRNP</i>     | ENSG00000171867 | 0.22                     | 0.26 | 0.3180                |

|                 |                 |       |      |        |
|-----------------|-----------------|-------|------|--------|
| <i>EPHX2</i>    | ENSG00000120915 | -0.52 | 0.77 | 0.3180 |
| <i>DUSP1</i>    | ENSG00000120129 | 0.21  | 0.56 | 0.3830 |
| <i>HSP90AA1</i> | ENSG00000080824 | 0.14  | 0.32 | 0.3830 |
| <i>FTH1</i>     | ENSG00000167996 | 0.12  | 0.19 | 0.3830 |
| <i>BAG2</i>     | ENSG00000112208 | -0.23 | 0.42 | 0.3830 |
| <i>NOS2</i>     | ENSG00000007171 | -0.31 | 0.66 | 0.3940 |
| <i>GSTP1</i>    | ENSG00000084207 | -0.05 | 0.46 | 0.4560 |
| <i>MPV17</i>    | ENSG00000115204 | -0.08 | 0.17 | 0.4560 |
| <i>GCLM</i>     | ENSG00000023909 | -0.09 | 0.32 | 0.4560 |
| <i>TXNRD2</i>   | ENSG00000184470 | -0.13 | 0.28 | 0.4560 |
| <i>PRDX2</i>    | ENSG00000167815 | -0.26 | 0.52 | 0.4560 |
| <i>SELENOS</i>  | ENSG00000131871 | -0.35 | 0.76 | 0.4560 |
| <i>SOD2</i>     | ENSG00000112096 | -0.11 | 0.37 | 0.5340 |
| <i>NCOA7</i>    | ENSG00000111912 | -0.12 | 0.35 | 0.5350 |
| <i>PRDX4</i>    | ENSG00000123131 | -0.17 | 0.40 | 0.5350 |
| <i>NCF1</i>     | ENSG00000158517 | -0.20 | 0.53 | 0.5350 |
| <i>SLC7A11</i>  | ENSG00000151012 | 0.09  | 0.47 | 0.6200 |
| <i>SOD1</i>     | ENSG00000142168 | -0.11 | 0.44 | 0.6200 |
| <i>TTN</i>      | ENSG00000155657 | 0.18  | 0.90 | 0.7100 |
| <i>SELENOP</i>  | ENSG00000250722 | 0.12  | 0.62 | 0.7100 |
| <i>LHPP</i>     | ENSG00000107902 | 0.06  | 0.29 | 0.7100 |
| <i>PTGR1</i>    | ENSG00000106853 | 0.04  | 0.75 | 0.7100 |
| <i>MPO</i>      | ENSG00000005381 | 0.01  | 1.10 | 0.7100 |
| <i>GPX1</i>     | ENSG00000233276 | -0.04 | 0.32 | 0.7100 |
| <i>KRT1</i>     | ENSG00000167768 | -1.01 | 4.50 | 0.7100 |
| <i>MSRA</i>     | ENSG00000175806 | 0.05  | 0.32 | 0.8050 |
| <i>ATOX1</i>    | ENSG00000177556 | -0.01 | 0.21 | 0.8050 |
| <i>TXNRD1</i>   | ENSG00000198431 | -0.05 | 0.25 | 0.8050 |
| <i>BNIP3</i>    | ENSG00000176171 | -0.10 | 0.44 | 0.8050 |
| <i>HSPA1A</i>   | ENSG00000204389 | -0.10 | 0.60 | 0.8050 |
| <i>CCL5</i>     | ENSG00000271503 | -0.20 | 0.91 | 0.8050 |
| <i>AKR1C2</i>   | ENSG00000151632 | -0.25 | 2.10 | 0.8050 |
| <i>GCLC</i>     | ENSG00000001084 | 0.30  | 0.59 | 0.9020 |

|               |                 |       |      |        |
|---------------|-----------------|-------|------|--------|
| <i>PRDX1</i>  | ENSG00000117450 | 0.05  | 0.51 | 0.9020 |
| <i>GSS</i>    | ENSG00000100983 | -0.03 | 0.27 | 0.9020 |
| <i>GPX2</i>   | ENSG00000176153 | -0.05 | 0.36 | 0.9020 |
| <i>NCF2</i>   | ENSG00000116701 | -0.08 | 0.27 | 0.9020 |
| <i>PTGS2</i>  | ENSG00000073756 | -0.09 | 0.90 | 0.9020 |
| <i>TXN</i>    | ENSG00000136810 | 0.01  | 0.28 | 1.0000 |
| <i>GSTZ1</i>  | ENSG00000100577 | -0.04 | 0.32 | 1.0000 |
| <i>SQSTM1</i> | ENSG00000161011 | -0.05 | 0.29 | 1.0000 |
| <i>PRDX3</i>  | ENSG00000165672 | -0.07 | 0.51 | 1.0000 |
