# Supplementary material for: Dipeptide Repeat Pathology in C9orf72-ALS Is Associated with Redox, Mitochondrial and NRF2 Pathway Imbalance
Source: MDPI journal article supplement (doi:10.3390/antiox11101897), 2022-09-25
Supplement: s1 [file s1]

**Table S1.** RT<sup>2</sup> Profiler™ PCR Array Human Oxidative Stress Plus, PAHS-065Y, Qiagen

|                                                                                                                                                                                                                                                                                                                                                                                                                                 |                                                                                                                                                                                                                                                                                                                                                                                         |
|---------------------------------------------------------------------------------------------------------------------------------------------------------------------------------------------------------------------------------------------------------------------------------------------------------------------------------------------------------------------------------------------------------------------------------|-----------------------------------------------------------------------------------------------------------------------------------------------------------------------------------------------------------------------------------------------------------------------------------------------------------------------------------------------------------------------------------------|
| <p><b>Endogenous antioxidant systems</b></p> <p><i>Glutathione peroxidases:</i> GPX1, GPX2, GPX3, GPX4, GPX5, GSTP1, GSTZ1.</p> <p><i>Peroxiredoxins:</i> PRDX1, PRDX2, PRDX3, PRDX4, PRDX5, PRDX6 (AOP2).</p> <p><i>Other peroxidases:</i> CAT, CYBB, CYGB, DUOX1, DUOX2, EPX, LPO, MPO, PTGS1, PTGS2 (COX2), TPO, TTN.</p> <p><i>Other antioxidants:</i> ALB, APOE, GSR, MT3, SELENOS, SOD1, SOD3, SRXN1, TXNRD1, TXNRD2.</p> | <p><b>Metabolism of reactive oxygen species</b></p> <p><i>Superoxide dismutases:</i> SOD1, SOD2, SOD3.</p> <p><i>Other genes involved in superoxide metabolism:</i> ALOX12, CCS, DUOX1, DUOX2, MT3, NCF1, NCF2, NOS2 (iNOS), NOX4, NOX5, UCP2.</p> <p><i>Other genes involved in ROS metabolism:</i> AOX1, BNIP3, EPHX2, MPV17, SFTPD.</p> <p><i>Oxygen transporters:</i> CYGB, MB.</p> |
| <p><b>Oxidative stress responsive genes</b></p> <p>APOE, ATOX1, CAT, CCL5 (RANTES), CYGB, DHCR24, DUOX1, DUOX2, DUSP1 (PTPN16), EPX, FOXM1, FTH1, GCLC, GCLM, GPX1, GPX2, GPX3, GPX4, GPX5, GSR, GSS, HMOX1, HSPA1A, KRT1, LPO, MBL2, MPO, MSRA, NQO1, NUDT1, PDLIM1, PRDX2, PRDX5, PRDX6 (AOP2), PRNP, RNF7, VIMP, SELENOP, SIRT2, SOD1, SOD2, SQSTM1, SRXN1, TPO, TTN, TXN, TXNRD1, TXNRD2.</p>                               |                                                                                                                                                                                                                                                                                                                                                                                         |
| <p><b>Pathway activity signature genes</b></p> <p>AKR1C2, BAG2, FHL2, GCLM, GLA, HMOX1, HSP90AA1, LHPP, NCOA7, NQO1, PTGR1, SLC7A11, SPINK1, TRAPPC6A, TXN, TXNRD1.</p>                                                                                                                                                                                                                                                         |                                                                                                                                                                                                                                                                                                                                                                                         |
